# Supplementary material
Source: PubMed Central journal article supplement (PMC10952458)
Supplement: ART-75-1088-s003.pdf [file ART-75-1088-s003.pdf]

**Table S-1. cg13249593 is in predicted enhancer (GH17J041546) for several genes.**

| Gene                   | Description                                                                                       | Category          | GIFtS | Relevance Score |
|------------------------|---------------------------------------------------------------------------------------------------|-------------------|-------|-----------------|
| <i>ACLY</i>            | ATP Citrate Lyase                                                                                 | Protein Coding    | 50    | 1.07            |
| <i>STAT5A</i>          | Signal Transducer And Activator Of Transcription 5A                                               | Protein Coding    | 50    | 1.07            |
| <i>KRT14</i>           | Keratin 14                                                                                        | Protein Coding    | 49    | 1.07            |
| <i>SMARCE1</i>         | SWI/SNF Related, Matrix Associated, Actin Dependent Regulator of Chromatin, Subfamily E, Member 1 | Protein Coding    | 47    | 1.07            |
| <i>KRT19</i>           | Keratin 19                                                                                        | Protein Coding    | 46    | 1.07            |
| <i>NAGLU</i>           | N-Acetyl-Alpha-Glucosaminidase                                                                    | Protein Coding    | 45    | 1.07            |
| <i>KRT9</i>            | Keratin 9                                                                                         | Protein Coding    | 44    | 1.07            |
| <i>CAVIN1</i>          | Caveolae Associated Protein 1                                                                     | Protein Coding    | 43    | 1.07            |
| <i>KRT15</i>           | Keratin 15                                                                                        | Protein Coding    | 41    | 1.07            |
| <i>KLHL10</i>          | Kelch Like Family Member 10                                                                       | Protein Coding    | 40    | 1.07            |
| <i>LINC00974</i>       | Long Intergenic Non-Protein Coding RNA 974                                                        | RNA Gene          | 16    | 1.07            |
| <i>ENSG00000267758</i> | Novel Transcript                                                                                  | RNA Gene          | 9     | 1.07            |
| <i>HSALNG0116441</i>   |                                                                                                   | RNA Gene          | 5     | 1.07            |
| <i>piR-48749-021</i>   |                                                                                                   | RNA Gene          | 4     | 1.07            |
| <i>LOC116276463</i>    | CRISPRi-Validated Cis-Regulatory Element Chr17.2497                                               | Biological Region | 2     | 0.93            |

Abbreviations: GIFtS, GeneCards Inferred Functionality Scores.

Table data from <https://www.genecards.org/Search/Keyword?queryString=GH17J041546>

**Table S-2. TCA cell-specific DMRs.**

| Region<br>chr:bp       | Model   | Cell<br>type | No.<br>CpG | $\Delta$ Meth. | $p$     | GREAT<br>annotation <sup>a</sup> | Illumina annotation     |         | CpG<br>Island |
|------------------------|---------|--------------|------------|----------------|---------|----------------------------------|-------------------------|---------|---------------|
|                        |         |              |            |                |         | Gene<br>(Dist. to TSS)           | Gene                    | Feature |               |
| 1:161008461_161008826  | R0-NR0  | CD8T         | 8          | hyper          | 9.5e-18 |                                  | TSTD1                   | TS200   | Island        |
| 12:9217389_9_217907    | R0-NR0  | Bcell        | 10         | hyper          | 5.8e-15 |                                  | LOC144571               | TS200   | Island        |
| 1:202310823_202311278  | R1-NR1  | Neu          | 7          | hyper          | 3.1e-14 |                                  | UBE2T                   | TS200   | Island        |
| 17:6899084_6_899577    | R1-NR1  | Mono         | 11         | hyper          | 2.0e-13 | ALOX12 (-53)                     | ALOX12                  | TS200   | Island        |
| 13:36871753_36872346   | R1-R0   | NK           | 9          | hypo           | 8.6e-13 |                                  | C13orf38                | TS200   | Island        |
| 1:161008461_161008826  | R0-NR0  | CD4T         | 8          | hypo           | 1.8e-12 |                                  | TSTD1                   | TS200   | Island        |
| 17:6899084_6_899577    | R1-NR1  | NK           | 11         | hypo           | 4.9e-12 | ALOX12 (-53)                     | ALOX12                  | TS200   | Island        |
| 10:77542301_77542585   | R0-NR0  | CD4T         | 9          | hyper          | 1.5e-11 |                                  | C10orf11                | TS200   | OpenSea       |
| 6:32063725_3_2064258   | R1-NR1  | NK           | 16         | hypo           | 5.9e-11 | TNXB (-50087)                    | TNXB                    | Body    | Island        |
| 6:31148331_3_1148748   | R0-NR0  | CD8T         | 15         | hyper          | 1.2e-10 |                                  |                         |         | Island        |
| 13:111267666_111268031 | R1-NR1  | Bcell        | 10         | hypo           | 1.1e-10 |                                  | CARKD                   | TS200   | Island        |
| 6:30881463_3_0881920   | R0-NR0  | NK           | 22         | hypo           | 2.0e-10 |                                  | VARS2                   | TS200   | Island        |
| 8:22132664_2_2133004   | R0-NR0  | CD8T         | 9          | hypo           | 2.0e-10 |                                  | PIWIL2                  | TS200   | Island        |
| 12:9217509_9_217907    | R0-NR0  | CD8T         | 9          | hypo           | 9.9e-10 |                                  | LOC144571               | TS200   | Island        |
| 19:55549589_55549842   | R1-NR1  | Mono         | 7          | hypo           | 9.8e-10 |                                  | GP6                     | TS200   | OpenSea       |
| 6:30419490_3_0419576   | R0-NR0  | CD4T         | 5          | hypo           | 4.0e-10 |                                  |                         |         | Island        |
| 16:1030387_1_030619    | R0-NR0  | CD4T         | 7          | hyper          | 4.5e-09 | SOX8 (-1305)                     | SOX8                    | TSS1500 | Island        |
| 10:42862875_42863444   | R1-NR1  | NK           | 5          | hypo           | 1.4e-08 |                                  | LOC441666               | Body    | Island        |
| 2:21266726_2_1266995   | R0-NR0  | NK           | 6          | hypo           | 7.5e-09 | APOB (+84)                       | APOB                    | TS200   | Island        |
| 2:43903581_4_3903842   | R1-NR1  | Bcell        | 3          | hyper          | 1.7e-08 |                                  | PLEKHH2;L<br>OC728819   | TS200   | OpenSea       |
| 6:1604012_16_04212     | NR1-NR0 | Mono         | 5          | hypo           | 1.3e-08 |                                  |                         |         | N_Shore       |
| 12:52473421_52473731   | R1-NR1  | Bcell        | 4          | hyper          | 2.3e-08 |                                  |                         |         | Island        |
| 2:109746690_109746754  | R1-R0   | Neu          | 4          | hyper          | 5.6e-09 |                                  | LOC100287<br>216;SH3RF3 | TS200   | Island        |

| Region<br>chr:bp       | Model   | Cell<br>type | No.<br>CpG | $\Delta$ Meth. | GREAT<br>annotation <sup>a</sup> |                        | Illumina annotation              |                                                   |               |
|------------------------|---------|--------------|------------|----------------|----------------------------------|------------------------|----------------------------------|---------------------------------------------------|---------------|
|                        |         |              |            |                | <i>p</i>                         | Gene<br>(Dist. to TSS) | Gene                             | Feature                                           | CpG<br>Island |
| 19:54106592_54106876   | NR1-NR0 | Mono         | 3          | hypo           | 2.5e-08                          |                        | LOC284379                        | TS200                                             | OpenSea       |
| 13:23309929_23310464   | R1-NR1  | Bcell        | 5          | hyper          | 5.2e-08                          |                        |                                  |                                                   | OpenSea       |
| 16:54210495_54210550   | R0-NR0  | NK           | 2          | hypo           | 6.5e-09                          |                        |                                  |                                                   | OpenSea       |
| 6:30419490_30419576    | R0-NR0  | Bcell        | 5          | hyper          | 2.2e-08                          |                        |                                  |                                                   | Island        |
| 17:41438329_41438402   | R0-NR0  | CD8T         | 3          | hyper          | 2.1e-08                          |                        |                                  |                                                   | Island        |
| 10:8096632_8096818     | R1-NR1  | Bcell        | 5          | hypo           | 3.3e-07                          |                        | FLJ45983                         | TS200                                             | Island        |
| 11:117069848_117070046 | R1-NR1  | NK           | 4          | hypo           | 5.5e-07                          |                        | TAGLN                            | TS200                                             | OpenSea       |
| 6:32847761_32847845    | R0-NR0  | NK           | 6          | hypo           | 4.7e-06                          |                        | PPP1R2P1                         | Body                                              | Island        |
| 22:31318239_31318373   | R1-NR1  | Bcell        | 3          | hypo           | 2.8e-05                          |                        | C22orf27                         | TS200                                             | Island        |
| 3:159557778_159557797  | R1-NR1  | NK           | 2          | hypo           | 3.7e-05                          | SCHIP1 (+138)          | SCHIP1                           | Body                                              | OpenSea       |
| 2:113993051_113993142  | R1-NR1  | Bcell        | 2          | hyper          | 5.2e-04                          |                        | PAX8;<br>LOC440839;<br>LOC654433 | Body;Body;<br>Body;Body;<br>Body;Body;<br>TSS1500 | N_Shore       |
| 6:31939279_31939322    | NR1-NR0 | Mono         | 3          | hypo           | 3.6e-04                          |                        | STK19;DOM<br>3Z                  | TSS1500;TS<br>S1500;Body;<br>Body                 | N_Shore       |
| 4:103940922_103940950  | R0-NR0  | Bcell        | 2          | hypo           | 2.8e-04                          |                        | NHEDC1;NH<br>EDC1                | TS200                                             | Island        |
| 6:32121112_32121204    | R1-NR1  | Neu          | 5          | hypo           | 4.6e-03                          |                        | PPT2;PRRT<br>1                   | TS200                                             | N_Shore       |
| 11:86383235_86383241   | R1-NR1  | Bcell        | 2          | hypo           | 5.1e-03                          |                        | ME3                              | TS200                                             | Island        |
| 20:3052114_3052151     | R1-R0   | NK           | 2          | hypo           | 4.2e-03                          | OXT (-133)             | OXT                              | TS200                                             | Island        |

Abbreviations: bp, base pair; chr; chromosome; CI, Confidence Interval; FDR, false discovery rate; GREAT, Genomic Regions Enrichment of Annotations Tool; Hyper, Hypermethylation; Hypo, Hypomethylation; NR, treatment non-responder; R, treatment responder; T<sub>0</sub>, baseline visit.

<sup>a</sup> Distance from CpG to transcription start site of nearest upstream and downstream gene from rGREAT.

**Table S-3. Results from analyses among self-report white participants for *limma* DMP results with  $p < 1 \times 10^{-6}$ .**

| CpG        | Model <sup>b</sup>                                                    | Primary Analyses |          | Within self-report white participants only |          |
|------------|-----------------------------------------------------------------------|------------------|----------|--------------------------------------------|----------|
|            |                                                                       | % $\Delta$ Beta  | <i>p</i> | % $\Delta$ Beta                            | <i>p</i> |
| cg06336912 | T <sub>1</sub> : R-NR                                                 | -5.86            | 6.5e-6   | -6.49                                      | 6.2E-06  |
| cg15936718 | T <sub>1</sub> : R-NR                                                 | -3.49            | 8.9e-6   | -3.72                                      | 2.8E-05  |
| cg16868591 | (R <sub>1</sub> -R <sub>0</sub> )-(NR <sub>1</sub> -NR <sub>0</sub> ) | -3.39            | 3.0e-6   | -3.24                                      | 2.5E-05  |
| cg19506849 | R <sub>1</sub> -R <sub>0</sub>                                        | 2.64             | 9.4e-6   | 2.63                                       | 1.4E-06  |
| cg18224793 | NR <sub>1</sub> -NR <sub>0</sub>                                      | 2.34             | 4.7e-6   | 2.34                                       | 2.6E-06  |

Abbreviations: bp, base pair; chr; chromosome; CI, Confidence Interval; FDR, false discovery rate; GREAT, Genomic Regions Enrichment of Annotations Tool; NR, treatment non-responder; R, treatment responder; T<sub>0</sub>, baseline visit.

<sup>a</sup> Distance from CpG to transcription start site of nearest upstream and downstream gene from rGREAT.

**Table S-4. Results from analyses among self-report white participants for *TCA* DMP analyses.**

| CpG        | Model                 | Analysis                              | Cell type | $\Delta$ Meth. | Joint model                      | Marginal conditional model p-value |
|------------|-----------------------|---------------------------------------|-----------|----------------|----------------------------------|------------------------------------|
| cg13249593 | T <sub>0</sub> : R-NR | Primary                               | CD4T      | 0.226          | <i>p</i> : 2.4E-8                | 4.6E-6                             |
|            |                       |                                       | CD8T      | -0.310         | <i>p</i> <sub>FDR</sub> : 9.5E-3 | 1.8E-5                             |
|            |                       |                                       | NK        | -0.489         |                                  | 2.3E-6                             |
|            |                       | Within self-report white participants | CD4T      | 0.217          | <i>p</i> : 4.8E-7                | 3.8E-5                             |
|            |                       |                                       | CD8T      | -0.315         | <i>p</i> <sub>FDR</sub> : 0.957  | 5.0E-5                             |
|            |                       |                                       | NK        | -0.501         |                                  | 2.6E-5                             |

Abbreviations: FDR, false discovery rate; GREAT, Genomic Regions Enrichment of Annotations Tool; NR, treatment non-responder; R, treatment responder; T<sub>0</sub>, baseline visit.

<sup>a</sup> Distance from CpG to transcription start site of nearest upstream and downstream gene from rGREAT.

<sup>b</sup> Model comparing difference in DNA methylation baseline before MTX treatment between those were identified as treatment responders compared to non-responders.

<sup>c</sup> Joint model from tensor composition analysis tests for evidence of differential methylation within any cell-type at each CpG.

**Table S-5. Meta analysis results for *limma* DMP results with  $p < 1 \times 10^{-6}$ .**

| CpG        | Model <sup>b</sup>                                                        | Primary Analyses |          | Meta-analyses <sup>a</sup> |          |                                   |
|------------|---------------------------------------------------------------------------|------------------|----------|----------------------------|----------|-----------------------------------|
|            |                                                                           | % $\Delta$ Beta  | <i>p</i> | % $\Delta$ Beta            | <i>p</i> | <i>p<sub>Q</sub></i> <sup>b</sup> |
| cg06336912 | T <sub>1</sub> : R-NR                                                     | -5.86            | 6.5e-6   | -5.00                      | 2.0E-08  | 0.84                              |
| cg15936718 | T <sub>1</sub> : R-NR                                                     | -3.49            | 8.9e-6   | -5.58                      | 7.4E-04  | 0.84                              |
| cg16868591 | (R <sub>1</sub> -R <sub>0</sub> )-<br>(NR <sub>1</sub> -NR <sub>0</sub> ) | -3.39            | 3.0e-6   | -4.36                      | 1.5E-05  | 0.71                              |
| cg19506849 | R <sub>1</sub> -R <sub>0</sub>                                            | 2.64             | 9.4e-6   | 2.38                       | 9.5E-04  | 0.94                              |
| cg18224793 | NR <sub>1</sub> -NR <sub>0</sub>                                          | 2.34             | 4.7e-6   | 1.95                       | 2.7E-03  | 0.70                              |

Abbreviations: bp, base pair; chr; chromosome; CI, Confidence Interval; FDR, false discovery rate; GREAT, Genomic Regions Enrichment of Annotations Tool; NR, treatment non-responder; R, treatment responder; T<sub>0</sub>, baseline visit.

<sup>a</sup> Inverse variance-meta analysis with random effect, calculated using Meta R package.

<sup>b</sup> P-value for Cochran's Q heterogeneity test. *I*<sup>2</sup> estimated to be 0 for all CpGs in this table.
